# Supplementary material for: Hybrid magnetic nanoparticle/nanogold clusters and their distance-dependent metal-enhanced fluorescence effect via DNA hybridization
Source: Royal Society of Chemistry journal article supplement (doi:10.1039/c4nr00648h), 2014-01-01
Supplement: c4nr00648h1.pdf [file c4nr00648h1.pdf]

## Supporting information

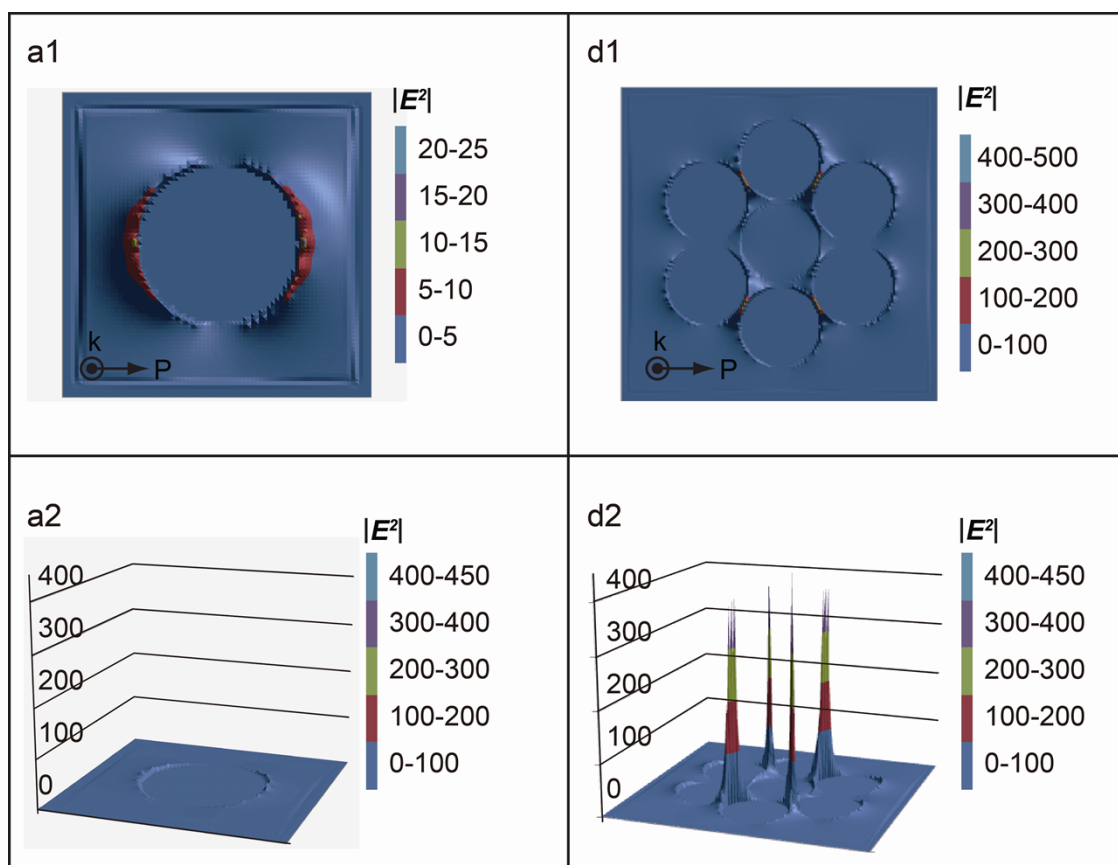

Fig.S1 Finite Difference Time Domain (FDTD) simulation of the local electric field around Au-SiO<sub>2</sub> hybrid NPs cluster consists of 6 AuNPs with gap of 1 nm using SiO<sub>2</sub> as the core. Scale bars = 20 nm. The excitation wavelength is 488 nm and incident electromagnetic wave along the z direction are polarized along the symmetry axis and perpendicular to it.

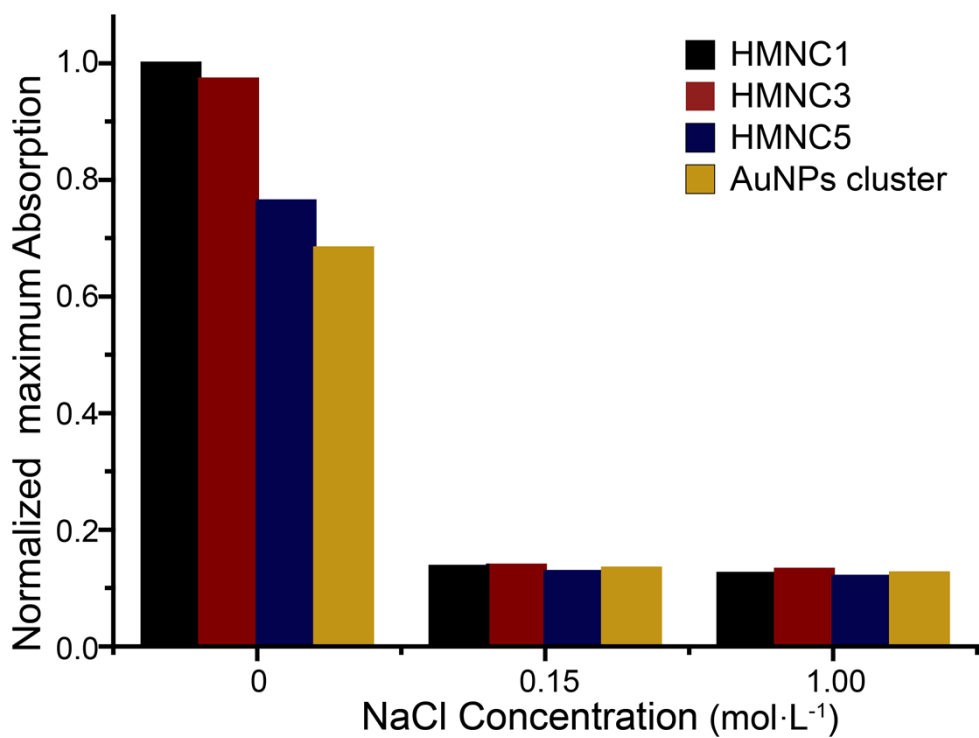

Fig.S2 Normalized maximum absorption of HMNC1, HMNC3, HMNC5 and AuNPs cluster in NaCl solutions of three different concentrations (0, 0.15, 1mol L<sup>-1</sup>) respectively.

Table S1 Distance-dependent MEF effect of fluorophore-dsDNA-HMNCs conjugates

| Conjugates     | Inter-distance (nm) | Enhancement Factor |
|----------------|---------------------|--------------------|
| F-B1A1-S-HMNC3 | 4                   | 10.8               |
| F-B1A2-S-HMNC3 | Very near           | 1                  |
| F-D1C1-S-HMNC3 | 5                   | 8                  |
| F-D2C1-S-HMNC3 | 3                   | 2                  |
| F-D3C1-S-HMNC3 | Very near           | 1                  |
